# Supplementary material for: Rice Snl6, a Cinnamoyl-CoA Reductase-Like Gene Family Member, Is Required for NH1-Mediated Immunity to Xanthomonas oryzae pv. oryzae
Source: PubMed Central journal article supplement (PMC2940737; doi:10.1371/journal.pgen.1001123), 2010-09-16
Supplement: pgen.1001123.s007.pdf [file pgen.1001123.s007.pdf]

Table S1. Complete list of deleted genes in *snl6-FN*.

|                        | <b>Locus ID</b>                                | <b>TIGR Annotation</b>                                              |
|------------------------|------------------------------------------------|---------------------------------------------------------------------|
| Deletion 1A (57 kbp)   | Os01g21370                                     | Transposon protein, putative                                        |
|                        | Os01g21380                                     | FAD dependent oxidoreductase domain containing protein, expressed   |
|                        | Os01g21390                                     | Hypothetical Protein                                                |
|                        | Os01g21400                                     | Retrotransposon putative                                            |
|                        | Os01g21410                                     | Expressed Protein                                                   |
|                        | Os01g21420                                     | pre-mRNA-splicing factor SF2, expressed                             |
|                        | Os01g21430                                     | Retrotransposon protein, putative, Ty3-gypsy subclass               |
|                        | Os01g21440                                     | Expressed Protein                                                   |
|                        | Os01g21450                                     | Expressed Protein                                                   |
|                        | Os01g21480                                     | Transposon protein, putative, CACTA, En/Spm sub-class               |
| Deletion 1B (13.5 kbp) | Os01g45160                                     | Conserved hypothetical protein                                      |
|                        | Os01g45174                                     | transposon protein, putative                                        |
|                        | Os01g45190                                     | DEAD-box ATP-dependent RNA helicase, putative, expressed            |
|                        | Os01g45200                                     | Cinnamoyl-CoA reductase-related, putative, expressed                |
|                        | Os01g45210                                     | Retrotransposon protein, putative, Ty3-gypsy subclass               |
|                        | Os01g45220                                     | Retrotransposon protein, putative, Ty3-gypsy subclass               |
| Deletion 2 (3 kbp)     | Os02g33730                                     | Ubiquinol-cytochrome C reductase hinge protein, putative, expressed |
| Deletion 3 (100.5 kbp) | Os03g56070                                     | Expressed Protein                                                   |
|                        | Os03g56080                                     | Hypothetical Protein                                                |
|                        | Os03g56090                                     | MYB family transcription factor, putative, expressed                |
|                        | Os03g56100                                     | hypothetical protein                                                |
|                        | Os03g56110                                     | Homeobox protein knotted-1, putative, expressed                     |
|                        | Os03g56120                                     | Hypothetical Protein                                                |
|                        | Os03g56130                                     | Lichenase-2 precursor, putative                                     |
|                        | Os03g56140                                     | Homeobox protein rough sheath 1, putative expressed                 |
|                        | Os03g56149                                     | Hypothetical Protein                                                |
|                        | Os03g56160                                     | Lectin-like receptor kinase 7, putative, expressed                  |
|                        | Os03g56170                                     | Conserved hypothetical protein                                      |
|                        | Os03g56180                                     | Legume lectins beta domain containing protein, expressed            |
|                        | Os03g56190                                     | Cytochrome c oxidase-related, putative, expressed                   |
|                        | Os03g56200                                     | Expressed Protein                                                   |
|                        | Os03g56220                                     | Stress-induced protein, putative, expressed                         |
|                        | Os03g56234                                     | myb/SANT domain protein, putative, expressed                        |
| Os03g56241             | 40S ribosomal protein S29, putative, expressed |                                                                     |
| Deletion (6 kbp)       | Os07g35810                                     | TKL IRAK DUF26-ld.6 - kinase, expressed                             |
