# Supplementary material for: Rice Snl6, a Cinnamoyl-CoA Reductase-Like Gene Family Member, Is Required for NH1-Mediated Immunity to Xanthomonas oryzae pv. oryzae
Source: PubMed Central journal article supplement (PMC2940737; doi:10.1371/journal.pgen.1001123), 2010-09-16
Supplement: pgen.1001123.s008.pdf [file pgen.1001123.s008.pdf]

Table S2. Efficiency (E) and R<sup>2</sup> values for realtime PCR primers.

| <b>Primers</b>           | <b>E (%)</b> | <b>R<sup>2</sup></b> |
|--------------------------|--------------|----------------------|
| 01g45190                 | 99.9         | 0.961                |
| 01g45200 ( <i>Snl6</i> ) | 104.7        | 0.989                |
| 03g18850 (PR10-family)   | 99.1         | 0.984                |
| 12g36850 (PR10-family)   | 98.3         | 0.986                |
| 02g41650 (PAL-family)    | 107.8        | 0.900                |
| NH1                      | 91.2         | 0.985                |
| UBQ5                     | 105.5        | 0.981                |
