# Supplementary material for: Rice Snl6, a Cinnamoyl-CoA Reductase-Like Gene Family Member, Is Required for NH1-Mediated Immunity to Xanthomonas oryzae pv. oryzae
Source: PubMed Central journal article supplement (PMC2940737; doi:10.1371/journal.pgen.1001123), 2010-09-16
Supplement: pgen.1001123.s009.pdf [file pgen.1001123.s009.pdf]

Table S3. Genotyping primers.

| <b>Gene</b> | <b>Forward</b>                      | <b>Reverse</b>                           |
|-------------|-------------------------------------|------------------------------------------|
| <i>Xa21</i> | ATAGCAACTGATTGCTTGG (H3 frag F)     | CGATCGGTATAACAGCAAAAC (3' <i>Xa21</i> R) |
| NH1ox       | TGATATACTTGGATGATGGCA (Ubi-1)       | GGACGGCGATGCGCGCGTC (PrNH22)             |
| Deletion 1A | AGCAGGAGGGAGAAGACACA (Os01g21420_F) | ACCAGGAAGCAAAGCAAAGA (Os01g21420_R)      |
| Deletion 1B | GAAGACGAACCGCGTCTG (Os01g45160_F)   | GGTGTACCTCTGATCACCTG (Os01g45160_R)      |
| Deletion 2  | GTTGCTTGTTGGTGGGAAC ( Os02g33730_F) | TCCGTGGGAAAATCAAAGAC (Os02g33730_R)      |
| Deletion 3  | TCCTCAGCAGCTTACCACCT (Os03g56234_F) | TGCGTCGAACAAGACGATAG (Os03g56234_R)      |
| Deletion 7  | TACACCGGTAATCCGATGGT (Os07g35810_F) | GGCCAAGGACTAAGGTCTC (Os07g35810_R)       |
