# Supplementary material for: Rice Snl6, a Cinnamoyl-CoA Reductase-Like Gene Family Member, Is Required for NH1-Mediated Immunity to Xanthomonas oryzae pv. oryzae
Source: PLoS Genet. 2010 Sep 16;6(9):e1001123. doi: 10.1371/journal.pgen.1001123 (PMC2940737; doi:10.1371/journal.pgen.1001123)
Supplement: Table S4 — Realtime PCR primers. (0.05 MB PDF) [file pgen.1001123.s010.pdf]

Table S4. Realtime PCR primers.

| <b>Gene</b>      | <b>Forward</b>                              | <b>Reverse</b>                           |
|------------------|---------------------------------------------|------------------------------------------|
| <i>NH1</i>       | CAGGTGAGAGTCTACGAGGAAGG (NH1_RT_S2)         | TTGTCTTTCAGGAGGTGGATTTGC<br>(NH1_RT_AS2) |
| Os01g45190       | GCTATCGGTGACTTCATCAATATC (BB190_RT_S1)      | AGACTCTGCCAGGTGTTCC (BB190_RT_AS1)       |
| Os01g45200       | CACCGTGGACGGTGATGGCGAACGTG<br>(200_RNAi_F2) | GCAACGACGACGTGAAGACGC (200_cDNA_R2)      |
| 03g18850         | AGTTCCTGGACGTGGACAAG                        | TCTCGTCCTTCACCTCCACT                     |
| 12g36850         | ACGCAGGGAGCGTATACAAG                        | CACCCTGCTCTTAACCTCCA                     |
| 02g41650         | GGCCTCCACATCGCTCGC                          | ACGGCCTCGCGGTCGA                         |
| <i>Ubiquitin</i> | ATGGCCAACCACTTCGACCG (UBQ5_F)               | TAAGCCTGCTGGTTGTAGACGT (UBQ5_R)          |
